# Supplementary material for: Biochemical Profile and Antioxidant Activity of Dried Fruit Produced from Apricot Cultivars Grown in Latvia
Source: MDPI journal article supplement (doi:10.3390/horticulturae10030205), 2024-02-22
Supplement: s1 [file s1]

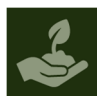

## Article

# Biochemical Profile and Antioxidant Activity of Dried Fruit Produced from Apricot Cultivars Grown in Latvia

Karina Juhnevica-Radenkova <sup>1</sup>, Inta Krasnova <sup>1</sup>, Dalija Seglina <sup>1</sup>, Edite Kaufmane <sup>1</sup>, Ilze Gravite <sup>1</sup>,  
Anda Valdovska <sup>2</sup> and Vitalijs Radenkovs <sup>1,2,\*</sup>

<sup>1</sup> Institute of Horticulture (LatHort), LV-3701 Dobeles, Latvia; karina.juhnevica-radenkova@lbtu.lv (K.J.-R.); inta.krasnova@lbtu.lv (I.K.); dalija.seglina@lbtu.lv (D.S.); edite.kaufmane@lbtu.lv (E.K.); ilze.gravite@lbtu.lv (I.G.)

<sup>2</sup> Research Laboratory of Biotechnology, Latvia University of Life Sciences and Technologies, LV-3004 Jelgava, Latvia; anda.valdovska@lbtu.lv

\* Correspondence: vitalijs.radenkovs@lbtu.lv

**Abstract:** The present study focused on evaluating the biochemical profiles of four apricot cultivars (cv.) (*Prunus armeniaca* L.) grown in Latvia and demonstrating their processing to obtain the food product, dried candied fruit (DCF). The fingerprinting of apricot fruit approached by LC-MS and ultraviolet–visible spectroscopy revealed the abundance of bioactives responsible for the antioxidant activity. The outstanding composition of group compounds, i.e., phenolics, flavonoids, and vitamin C, was observed in the cv. ‘Dimaija’, followed by cv. ‘Gundega’ and cv. ‘Velta’. The lowest values were found in the cv. ‘Boriss’ and fruit from a market of Greek origin. However, the latter two contained the highest carotenoid levels due to a more pronounced maturity. Amongst the 13 individual phenolics detected, rutin, chlorogenic and neochlorogenic acids, catechin, and epicatechin prevailed. The concentrations observed were the highest in cv. ‘Dimaija’, followed by cv. ‘Velta’ and cv. ‘Gundega’. Osmotic dehydration and convective drying of apricot fruit variedly influenced the content of bioactives in DCF products. The most substantial decrease due to thermal lability was observed in the vitamin C content in DCF, accounting for a 95.3% loss for all cultivars. The content of total phenolics, flavonoids, and carotenoids in DCF, on average, was 62.7%, 49.6%, and 87.6% lower than that observed in the raw fruit, respectively. On average, the content of individual phenolics in DCF, such as rutin and chlorogenic acid, decreased by 63.8% and 20.8%, respectively. The decline in the content of bioactives was conditioned by the physical migration of the cell components to the hypertonic solution. However, the increase in the content of cell wall-bound phytochemicals, such as catechin and epicatechin, after osmotic dehydration and convective drying, was observed in DCF, corresponding to a 59.5% and 255.64% increase compared with the raw fruit, respectively. Panelists generally responded positively to the developed DCF; however, greater preference was given to products with a lower phenolic content, such as cv. ‘Boriss’ and those produced from the market fruit. It is believed that the high flavan-3-ols content, along with chlorogenic acid, contributed to the bitter taste of DCF. Overall, apricot fruits represent the abundance of bioactives retained in DCF after osmotic dehydration and convective drying. The findings observed in the current study allow to consider DCF as a functional food; however, given the high sugar content, their consumption should be in moderation.

**Keywords:** convective drying; fruit processing; fruit quality; hypertonic solution; osmosis; phenolic compounds

**Citation:** Juhnevica-Radenkova, K.; Krasnova, I.; Seglina, D.; Kaufmane, E.; Gravite, I.; Valdovska, A.; Radenkovs, V. Biochemical Profile and Antioxidant Activity of Dried Fruit Produced from Apricot Cultivars Grown in Latvia. *Horticulturae* **2024**, *10*, 205. <https://doi.org/10.3390/horticulturae10030205>

Academic Editor: Xuewu Duan

Received: 2 February 2024

Revised: 16 February 2024

Accepted: 19 February 2024

Published: 22 February 2024

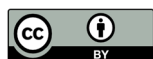

**Copyright:** © 2024 by the authors. Submitted for possible open access publication under the terms and conditions of the Creative Commons Attribution (CC BY) license (<https://creativecommons.org/licenses/by/4.0/>).

**Table S1.** Multiple reaction monitoring (MRM) transitions, collision energy, Q1, Q3 and dwell time for investigated phenolic compounds.

| Compound                   | Retention time, min | Molecular formula                               | Ionization mode    | MRM transitions   | Q1 Pre Bias, V | Collision energy, V | Q3 Pre Bias, V | Dwell time, msec |
|----------------------------|---------------------|-------------------------------------------------|--------------------|-------------------|----------------|---------------------|----------------|------------------|
| Gallic acid                | 8.430               | C <sub>7</sub> H <sub>6</sub> O <sub>5</sub>    | [M-H] <sup>-</sup> | 169.0000→124.9000 | 12.0           | 17.0                | 10.0           | 97.0             |
|                            |                     |                                                 |                    | 169.0000→78.9500  | 12.0           | 24.0                | 15.0           | 97.0             |
| Neochlorogenic acid        | 9.736               | C <sub>16</sub> H <sub>18</sub> O <sub>9</sub>  | [M-H] <sup>-</sup> | 353.1000→191.0500 | 13.0           | 22.0                | 20.0           | 63.0             |
|                            |                     |                                                 |                    | 353.1000→135.0000 | 13.0           | 31.0                | 12.0           | 63.0             |
| Protocatechuic acid        | 11.074              | C <sub>7</sub> H <sub>6</sub> O <sub>4</sub>    | [M-H] <sup>-</sup> | 153.2000→108.9500 | 10.0           | 16.0                | 20.0           | 21.0             |
|                            |                     |                                                 |                    | 153.2000→107.9500 | 10.0           | 24.0                | 22.0           | 21.0             |
| Chlorogenic acid           | 11.828              | C <sub>16</sub> H <sub>18</sub> O <sub>9</sub>  | [M-H] <sup>-</sup> | 353.1000→191.1000 | 19.0           | 22.0                | 20.0           | 18.0             |
|                            |                     |                                                 |                    | 353.1000→85.0500  | 13.0           | 43.0                | 16.0           | 18.0             |
| (+) -Catechin              | 12.180              | C <sub>15</sub> H <sub>14</sub> O <sub>6</sub>  | [M-H] <sup>-</sup> | 288.9500→245.0000 | 14.0           | 15.0                | 14.0           | 14.0             |
|                            |                     |                                                 |                    | 288.9500→109.0000 | 14.0           | 26.0                | 19.0           | 14.0             |
| (−)-Epicatechin            | 12.654              | C <sub>15</sub> H <sub>14</sub> O <sub>6</sub>  | [M-H] <sup>-</sup> | 289.0500→245.0000 | 14.0           | 16.0                | 14.0           | 14.0             |
|                            |                     |                                                 |                    | 289.0500→109.0000 | 14.0           | 26.0                | 20.0           | 14.0             |
| Vanillin                   | 12.974              | C <sub>8</sub> H <sub>8</sub> O <sub>3</sub>    | [M+H] <sup>+</sup> | 152.9500→65.1000  | -10.0          | -24.0               | -24.0          | 14.0             |
|                            |                     |                                                 |                    | 152.9500→93.0500  | -10.0          | -16.0               | -20.0          | 14.0             |
| Caffeic Acid               | 13.442              | C <sub>9</sub> H <sub>8</sub> O <sub>4</sub>    | [M-H] <sup>-</sup> | 179.1500→135.0000 | 12.0           | 18.0                | 25.0           | 23.0             |
|                            |                     |                                                 |                    | 179.1500→134.0000 | 12.0           | 25.0                | 24.0           | 23.0             |
| Rutin                      | 14.470              | C <sub>27</sub> H <sub>30</sub> O <sub>16</sub> | [M-H] <sup>-</sup> | 609.1000→300.0000 | 20.0           | 28.0                | 17.0           | 23.0             |
|                            |                     |                                                 |                    | 609.1000→301.0500 | 21.0           | 36.0                | 17.0           | 23.0             |
| <i>para</i> -Coumaric acid | 14.579              | C <sub>9</sub> H <sub>8</sub> O <sub>3</sub>    | [M-H] <sup>-</sup> | 163.0500→119.0500 | 11.0           | 16.0                | 21.0           | 23.0             |
|                            |                     |                                                 |                    | 163.0500→93.0500  | 12.0           | 31.0                | 17.0           | 23.0             |
| Luteolin-7-O-glucoside     | 14.717              | C <sub>21</sub> H <sub>20</sub> O <sub>11</sub> | [M-H] <sup>-</sup> | 447.0500→285.0500 | 20.0           | 28.0                | 17.0           | 23.0             |
|                            |                     |                                                 |                    | 447.0500→284.0000 | 21.0           | 36.0                | 17.0           | 23.0             |
| Vanillic acid              | 15.187              | C <sub>8</sub> H <sub>8</sub> O <sub>4</sub>    | [M-H] <sup>-</sup> | 167.1500→151.9500 | 18.0           | 17.0                | 27.0           | 23.0             |
|                            |                     |                                                 |                    | 167.1500→107.8000 | 11.0           | 17.0                | 17.0           | 23.0             |
| Sinapic acid               | 17.448              | C <sub>11</sub> H <sub>12</sub> O <sub>5</sub>  | [M-H] <sup>-</sup> | 223.3000→208.0000 | 17.0           | 14.0                | 12.0           | 23.0             |
|                            |                     |                                                 |                    | 223.3000→192.9500 | 10.0           | 22.0                | 19.0           | 23.0             |
| <i>trans</i> -Ferulic Acid | 19.884              | C <sub>10</sub> H <sub>10</sub> O <sub>4</sub>  | [M-H] <sup>-</sup> | 193.0500→134.0000 | 10.0           | 18.0                | 23.0           | 23.0             |
|                            |                     |                                                 |                    | 193.0500→178.0500 | 10.0           | 15.0                | 15.0           | 23.0             |
| Isorhamnetin               | 21.570              | C <sub>16</sub> H <sub>12</sub> O <sub>7</sub>  | [M+H] <sup>+</sup> | 316.8500→252.8500 | -20.0          | -14.0               | -19.0          | 70.0             |
|                            |                     |                                                 |                    | 316.8500→302.1000 | -20.0          | -25.0               | -13.0          | 70.0             |
| Kaempferol                 | 21.831              | C <sub>15</sub> H <sub>10</sub> O <sub>6</sub>  | [M+H] <sup>+</sup> | 286.8500→222.9500 | -18.0          | -13.0               | -17.0          | 70.0             |
|                            |                     |                                                 |                    | 286.8500→69.1000  | -18.0          | -45.0               | -14.0          | 70.0             |
| Quercetin                  | 20.644              | C <sub>15</sub> H <sub>10</sub> O <sub>7</sub>  | [M+H] <sup>+</sup> | 302.8000→153.0500 | -19.0          | -34.0               | -18.0          | 46.0             |
|                            |                     |                                                 |                    | 302.8000→229.1000 | -14.0          | -30.0               | -18.0          | 46.0             |
| Rhamnetin                  | 22.553              | C <sub>16</sub> H <sub>12</sub> O <sub>7</sub>  | [M-H] <sup>-</sup> | 315.0500→170.7500 | 15.0           | 12.0                | 15.0           | 70.0             |
|                            |                     |                                                 |                    | 315.0500→300.0500 | 22.0           | 22.0                | 19.0           | 70.0             |

**Note:** The first multiple reaction monitoring (MRM) transitions found were used for quantitative analysis, whereas the second for qualitative.

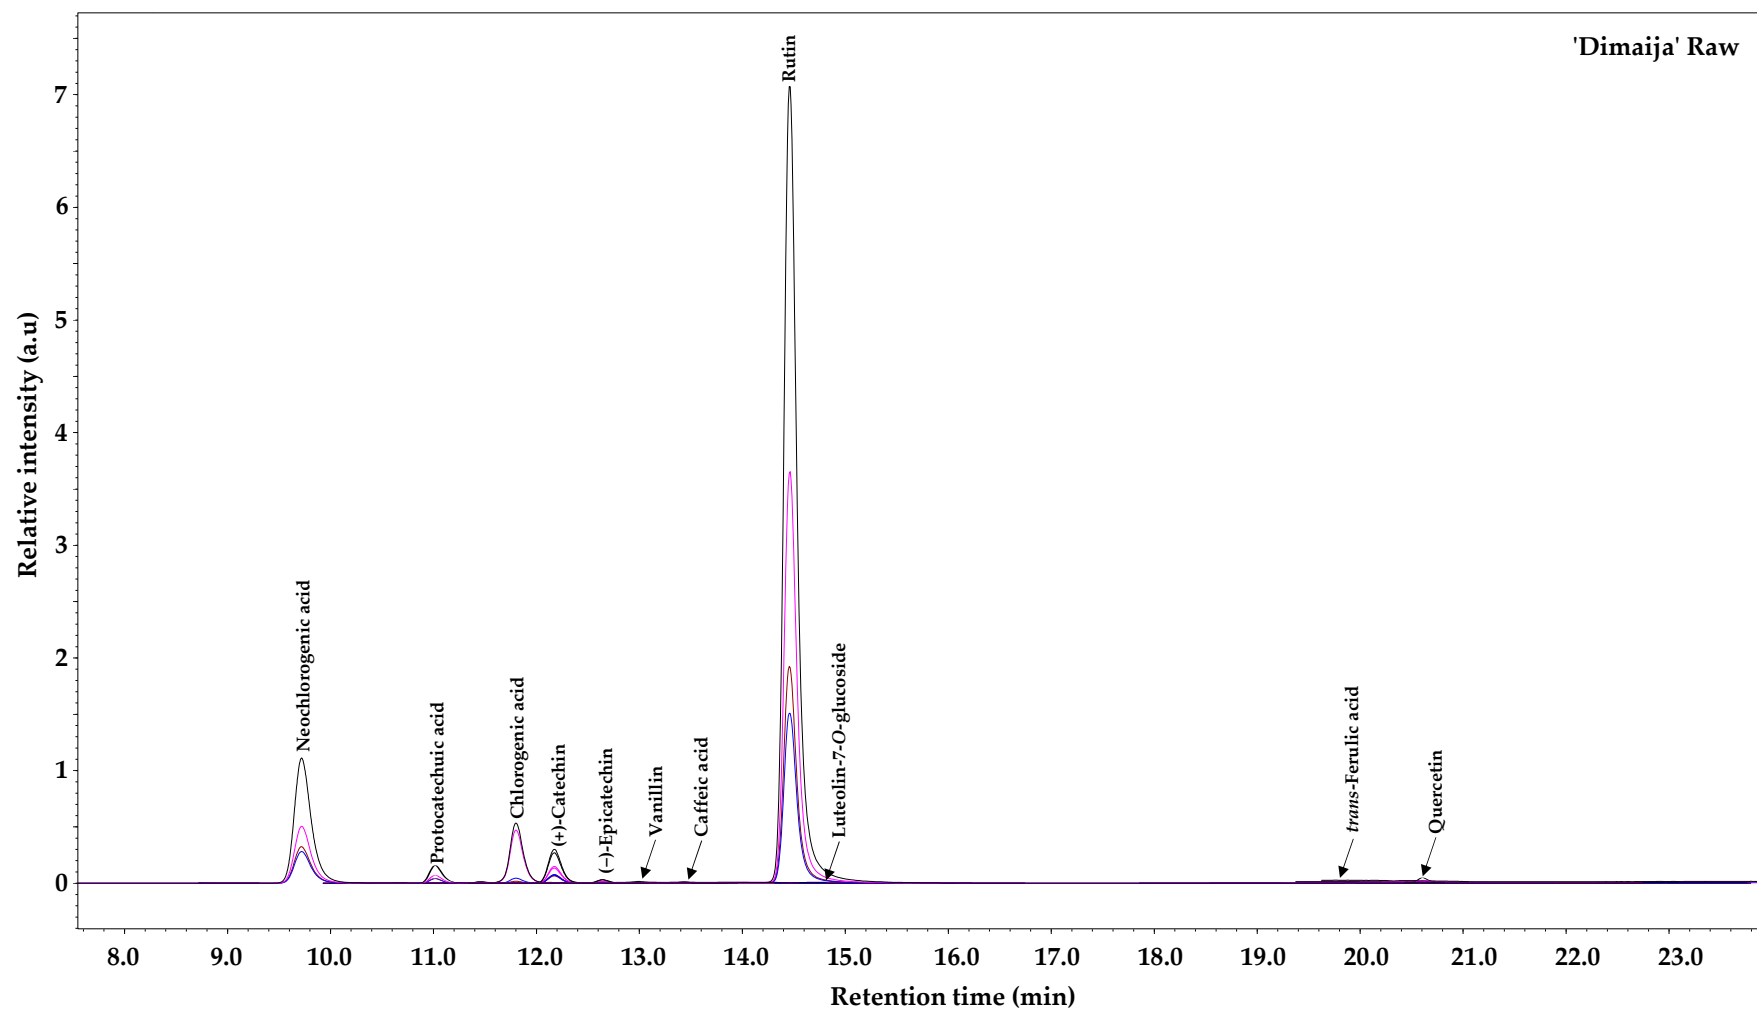

**Figure S1.** Extracted ion chromatogram (EIC) in multiple reaction monitoring (MRM) mode represents the profile of major phenolic compounds detected in raw apricot fruit of cultivar 'Dimaija'.

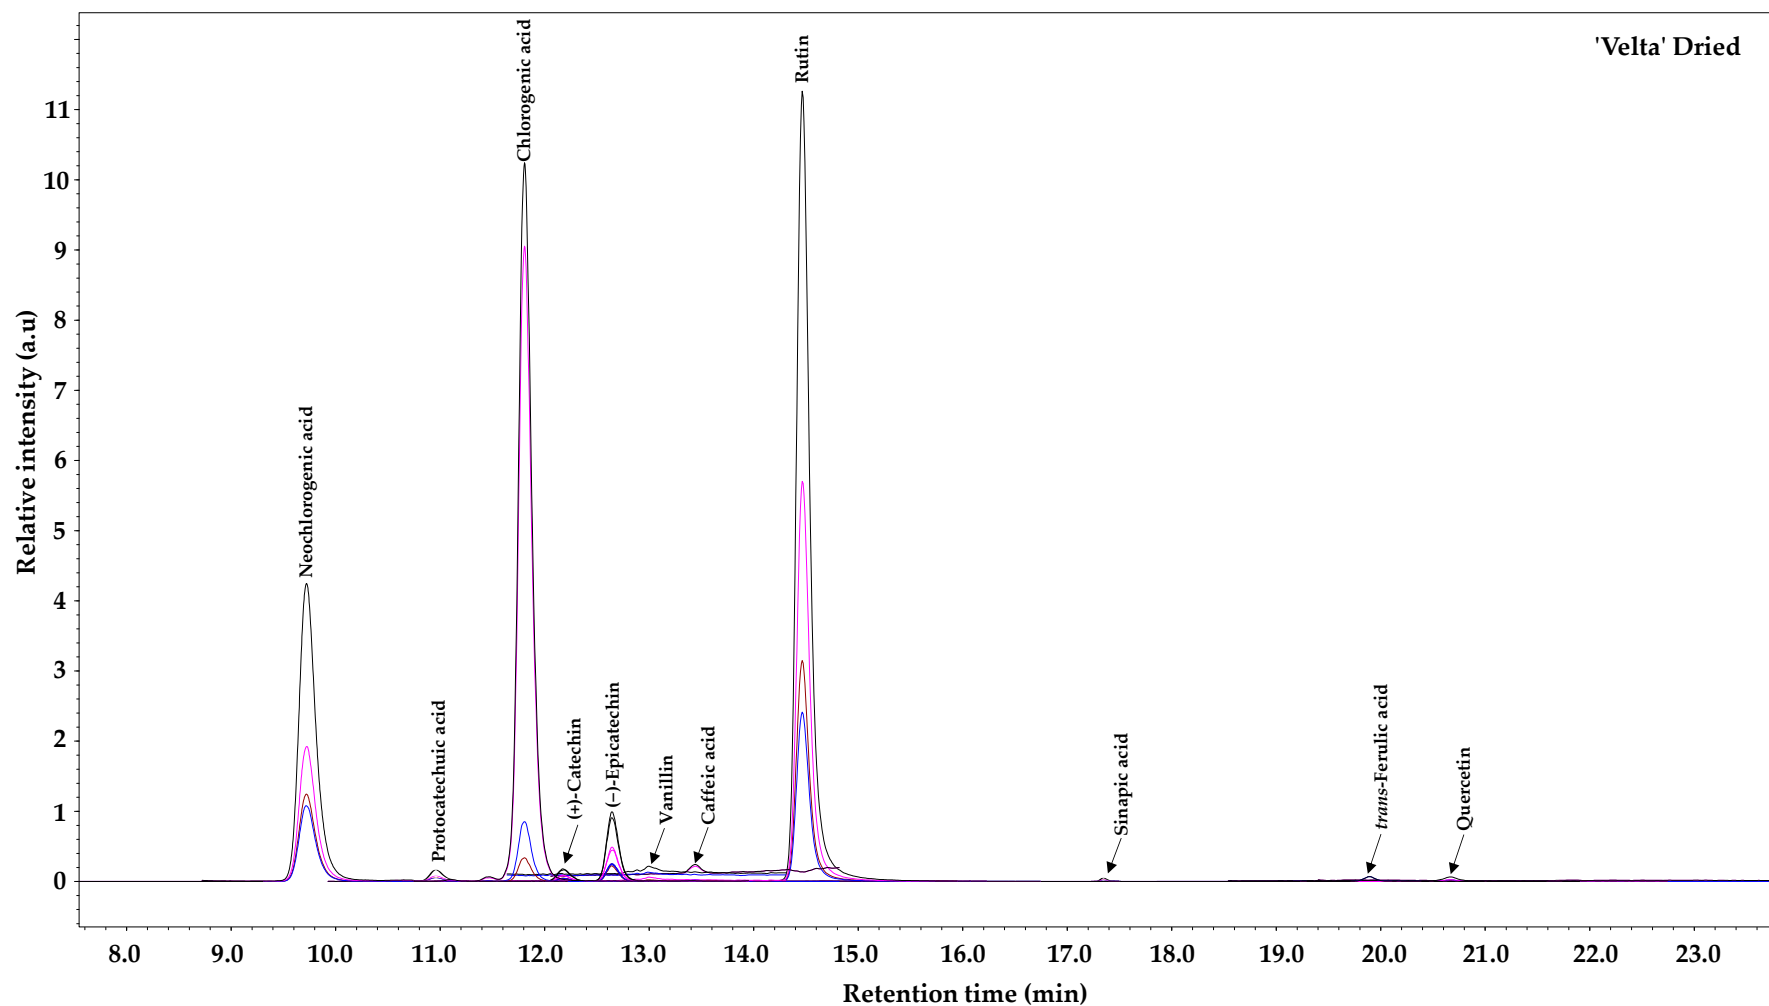

**Figure S2.** Extracted ion chromatogram (EIC) in multiple reaction monitoring (MRM mode) represents the profile of major phenolic compounds detected in dried candied apricot product of cultivar 'Velta'.
