# Supplementary material for: Biochemical Profile and Antioxidant Activity of Dried Fruit Produced from Apricot Cultivars Grown in Latvia
Source: MDPI journal article supplement (doi:10.3390/horticulturae10030205), 2024-02-22
Supplement: s1 [file s1]

Archive with 1 entries (1 files):
- horticulturae-2880013-supplementary.pdf
